# Supplementary material
Source: PubMed Central journal article supplement (PMC6704754)
Supplement: jamaneurol-76-1493-s005.pdf [file jamaneurol-76-1493-s005.pdf]

## Data Sharing Statement

Gladstone. Effect of Recombinant Activated Coagulation Factor VII on Hemorrhage Expansion Among Patients With Spot Sign-Positive Acute Intracerebral Hemorrhage. *JAMA Neurol.* Published August 19, 2019. 10.1001/jamaneurol.2019.2636

### Data

**Data available:** Yes

**Data types:** Deidentified participant data

**How to access data:** Requests may be sent to the corresponding author

**When available:** beginning date: 09-01-2019

### Supporting Documents

**Document types:** None

### Additional Information

**Who can access the data:** Researchers who submit a proposal that is reviewed and approved by the Steering Committee

**Types of analyses:** For approved projects

**Mechanisms of data availability:** After approval of a proposal
